# Supplementary material for: Noninvasive Ventilation and Rapid Enteral Feeding Advances in Preterm Infants—2-Year Follow-Up of the STENA-Cohort
Source: MDPI journal article supplement (doi:10.3390/nu15051292), 2023-03-06
Supplement: s1 [file s1]

## Supporting information S1

**E-Table S1: Demographics and characteristics of infants lost to follow-up of the STENA cohort study**

|                                  | lost to follow-up   | lost to follow-up   |                    |
|----------------------------------|---------------------|---------------------|--------------------|
|                                  | Standard group      | Fast group          | p-value            |
|                                  | (2015-2016)         | (2017-2018)         |                    |
|                                  | n = 46              | n = 29              |                    |
| Birth weight, g                  | 1175 (910-1395)     | 1320 (995-1440)     | 0.168 <sup>a</sup> |
| Gestational age, weeks           | 30.21 (27.86-31.71) | 30.43 (28.14-32.86) | 0.215 <sup>a</sup> |
| z-scores at birth                |                     |                     |                    |
| weight                           | -0.89 (-1.44--0.02) | -1.07 (-1.65--0.32) | 0.397 <sup>a</sup> |
| length                           | -0.59 (-1.05--0.02) | -0.66 (-1.38--0.25) | 0.636 <sup>a</sup> |
| head circumference               | -0.79 (-1.23--0.38) | -0.90 (-1.19--0.37) | 0.964 <sup>a</sup> |
| SGA <sup>c</sup>                 | 17 (37)             | 11 (37)             | 1.000 <sup>b</sup> |
| Male sex, n (%)                  | 27 (59)             | 64 (59)             | 1.000 <sup>b</sup> |
| Multiple birth, n (%)            | 27 (59)             | 12 (41)             | 0.221 <sup>b</sup> |
| Antenatal corticosteroids, n (%) | 40 (87)             | 25 (86)             | 0.428 <sup>b</sup> |

Note: Data shown as median (interquartile range) or n (%)

<sup>a</sup>Wilcoxon test

<sup>b</sup>Pearson with Yates' continuity correction test

<sup>c</sup>small for gestational age

**E-Table S2: Subgroup analyses of infants followed-up at 2 years separated for birth weight (BW) categories**

|                          | Standard group<br>(2015-2016)<br>n=99 | Fast group<br>(2017-2018)<br>n=119 | p-value            |
|--------------------------|---------------------------------------|------------------------------------|--------------------|
|                          | <=500g BW<br>n=4                      | <=500g BW<br>n=7                   |                    |
|                          | 500 < BW <=1000g<br>n=47              | 500 < BW <=1000g<br>n=55           |                    |
|                          | 1000 < BW <=1500g<br>n=48             | 1000 < BW <=1500g<br>n=57          |                    |
| <b>MDI<sup>c</sup></b>   |                                       |                                    |                    |
| <= 500g BW               | 80 (74-88)                            | 80 (65-98)                         | 0.930 <sup>a</sup> |
| 500 < BW <=1000g         | 95 (80-100)                           | 95 (85-108)                        | 0.486 <sup>a</sup> |
| 1000 < BW <=1500g        | 100 (90-110)                          | 93 (80-105)                        | 0.270 <sup>a</sup> |
| <b>PDI<sup>d</sup></b>   |                                       |                                    |                    |
| <= 500g BW               | 76 (76-78)                            | 82 (78-101)                        | 0.330 <sup>a</sup> |
| 500 < BW <=1000g         | 102 (84-117)                          | 100 (82-113)                       | 0.724 <sup>a</sup> |
| 1000 < BW <=1500g        | 119 (103-128)                         | 103 (96-127)                       | 0.080 <sup>a</sup> |
| <b>GMFCS<sup>e</sup></b> |                                       |                                    |                    |
| <= 500g BW               | 2 (1-2)                               | 1 (1-2)                            | 0.598 <sup>a</sup> |
| 500 < BW <=1000g         | 1 (1-1)                               | 1 (1-1)                            | 0.034 <sup>a</sup> |
| 1000 < BW <=1500g        | 1 (1-1)                               | 1 (1-1)                            | 0.665 <sup>a</sup> |

**severe hearing impairment**

|                   |       |       |                    |
|-------------------|-------|-------|--------------------|
| <= 500g BW        | 0 (0) | 0 (0) | -                  |
| 500 < BW <=1000g  | 0 (0) | 3 (5) | 0.300 <sup>b</sup> |
| 1000 < BW <=1500g | 2 (4) | 2 (4) | 1.000 <sup>b</sup> |

**blindness**

|                   |       |        |                    |
|-------------------|-------|--------|--------------------|
| <= 500g BW        | 0 (0) | 1 (14) | 1.000 <sup>b</sup> |
| 500 < BW <=1000g  | 0 (0) | 0 (0)  | -                  |
| 1000 < BW <=1500g | 0 (0) | 0 (0)  | -                  |

**z-scores for auxologic parameters at 2****years corrected age****weight**

|                   |                     |                    |                    |
|-------------------|---------------------|--------------------|--------------------|
| <= 500g BW        | -1.13 (-1.44--1.09) | -0.89 (-1.85-0.64) | 0.599 <sup>a</sup> |
| 500 < BW <=1000g  | -0.83 (-1.43--0.35) | -0.53 (-1.48-0.15) | 0.305 <sup>a</sup> |
| 1000 < BW <=1500g | -0.55 (-1.32-0.19)  | -0.42 (-0.94-0.06) | 0.632 <sup>a</sup> |

**length**

|                   |                     |                     |                    |
|-------------------|---------------------|---------------------|--------------------|
| <= 500g BW        | -2.07 (-2.19--1.64) | -0.91 (-1.34--0.51) | 0.230 <sup>a</sup> |
| 500 < BW <=1000g  | -0.48 (-1.39-0.28)  | -0.84 (-1.54-0.40)  | 0.985 <sup>a</sup> |
| 1000 < BW <=1500g | -0.54 (-1.29-0.09)  | -0.40 (-0.99-0.57)  | 0.159 <sup>a</sup> |

**head circumference**

|                   |                     |                     |                    |
|-------------------|---------------------|---------------------|--------------------|
| <= 500g BW        | -3.28 (-3.48--1.80) | -2.09 (-2.65--0.55) | 0.458 <sup>a</sup> |
| 500 < BW <=1000g  | -1.34 (-2.56--0.51) | -0.50 (-1.15-0.24)  | 0.004 <sup>a</sup> |
| 1000 < BW <=1500g | -0.50 (-1.49-0.24)  | -0.51 (-1.19-0.09)  | 0.991 <sup>a</sup> |

**Δz-score (weight 2 years-birth)**

|            |                   |                  |                    |
|------------|-------------------|------------------|--------------------|
| <= 500g BW | 0.45 (-0.04-0.92) | 0.88 (0.67-1.28) | 0.334 <sup>a</sup> |
|------------|-------------------|------------------|--------------------|

|                                              |                     |                    |                     |
|----------------------------------------------|---------------------|--------------------|---------------------|
| 500 < BW ≤1000g                              | -0.24 (-1.00-0.32)  | -0.06 (-0.69-0.60) | 0.418 <sup>a</sup>  |
| 1000 < BW ≤1500g                             | 0.19 (-0.60-0.89)   | 0.18 (-0.54-1.02)  | 0.787 <sup>a</sup>  |
| <b>Δz-score (weight 2 years-36 weeks GA)</b> |                     |                    |                     |
| ≤ 500g BW                                    | -0.14 (-0.33-0.17)  | 0.62 (0.24-0.91)   | 0.147 <sup>a</sup>  |
| 500 < BW ≤1000g                              | 0.38 (-0.37-0.90)   | 0.18 (-0.48-0.71)  | 0.349 <sup>a</sup>  |
| 1000 < BW ≤1500g                             | 0.61 (-0.12-1.46)   | 0.62 (-0.11-1.33)  | 0.750 <sup>a</sup>  |
| <b>Δz-score (length 2 years-birth)</b>       |                     |                    |                     |
| ≤ 500g BW                                    | -0.33 (-0.42--0.29) | -0.54 (-1.09-0.11) | 0.689 <sup>a</sup>  |
| 500 < BW ≤1000g                              | -0.11 (-0.78-0.62)  | -0.16 (-0.89-0.64) | 0.887 <sup>a</sup>  |
| 1000 < BW ≤1500g                             | 0.09 (-0.67-0.72)   | 0.64 (-0.49-1.28)  | 0.093 <sup>a</sup>  |
| <b>Δz-score (length 2 years-36 weeks GA)</b> |                     |                    |                     |
| ≤ 500g BW                                    | -0.06 (-0.09-0.66)  | 1.01 (0.11-2.73)   | 0.599 <sup>a</sup>  |
| 500 < BW ≤1000g                              | 1.43 (0.61-2.19)    | 0.62 (-0.23-1.61)  | 0.012 <sup>a</sup>  |
| 1000 < BW ≤1500g                             | 0.86 (0.16-1.52)    | 1.05 (0.09-1.81)   | 0.725 <sup>a</sup>  |
| <b>Δz-score (head 2 years-birth)</b>         |                     |                    |                     |
| ≤ 500g BW                                    | -0.76 (-1.55-0.06)  | -0.76 (-1.65-0.99) | 0.689 <sup>a</sup>  |
| 500 < BW ≤1000g                              | -0.78 (-1.77-0.13)  | 0.43 (-0.38-1.32)  | <0.001 <sup>a</sup> |
| 1000 < BW ≤1500g                             | 0.04 (-0.94-0.85)   | 0.06 (-0.63-1.02)  | 0.736 <sup>a</sup>  |
| <b>Δz-score (head 2 years-36 weeks GA)</b>   |                     |                    |                     |
| ≤ 500g BW                                    | -1.22 (-1.41--0.21) | 0.20 (-0.48-0.93)  | 0.334 <sup>a</sup>  |
| 500 < BW ≤1000g                              | 0.04 (-1.24-0.98)   | 0.51 (-0.53-1.25)  | 0.277 <sup>a</sup>  |
| 1000 < BW ≤1500g                             | 0.55 (-0.27-1.23)   | 0.29 (-0.45-0.79)  | 0.265 <sup>a</sup>  |

---

Note: Data shown as median (interquartile range) or n (%)

<sup>a</sup>Wilcoxon test

<sup>b</sup>Pearson with Yates' continuity correction test
